# Supplementary material for: Ionic liquid-mediated hexagonally porous ZnO nanocrystal-supported Au catalysts: highly stable materials for aldehyde oxidative esterification
Source: Royal Society of Chemistry journal article supplement (doi:10.1039/d2cy01667b), 2022-11-30
Supplement: d2cy01667b1.pdf [file d2cy01667b1.pdf]

## Supplementary Information

### Ionic Liquid-Mediated ZnO Shape-Controlled Nanocrystal-Supported Au Catalysts: Highly Stable Materials for aldehyde Oxidative esterification

Yanxia Zheng<sup>a</sup>, Lixi Yang<sup>a</sup>, Yao Chen<sup>a</sup>, Yubo Yang<sup>a</sup>, Cuncun Zuo<sup>a</sup>, Jiutao An<sup>b</sup>, Qian Wang<sup>c</sup>, Haofei Huang<sup>a</sup>, Yuchao Li<sup>a, \*</sup>, Ming Wang<sup>a, \*</sup>

<sup>a</sup> School of Chemistry and Chemical Engineering, Institute of Clean Chemical Technology, Shandong University of Technology, Zibo 255049, P.R. China

<sup>b</sup> School of Resources and Environmental Engineering, Shandong University of Technology, Zibo 255049, P.R. China

<sup>c</sup> College of Chemistry, Chemical Engineering and Materials Science, Shandong Normal University, Jinan, Shandong, 250014 P.R. China

\* Corresponding author. Email address: cyulee@126.com

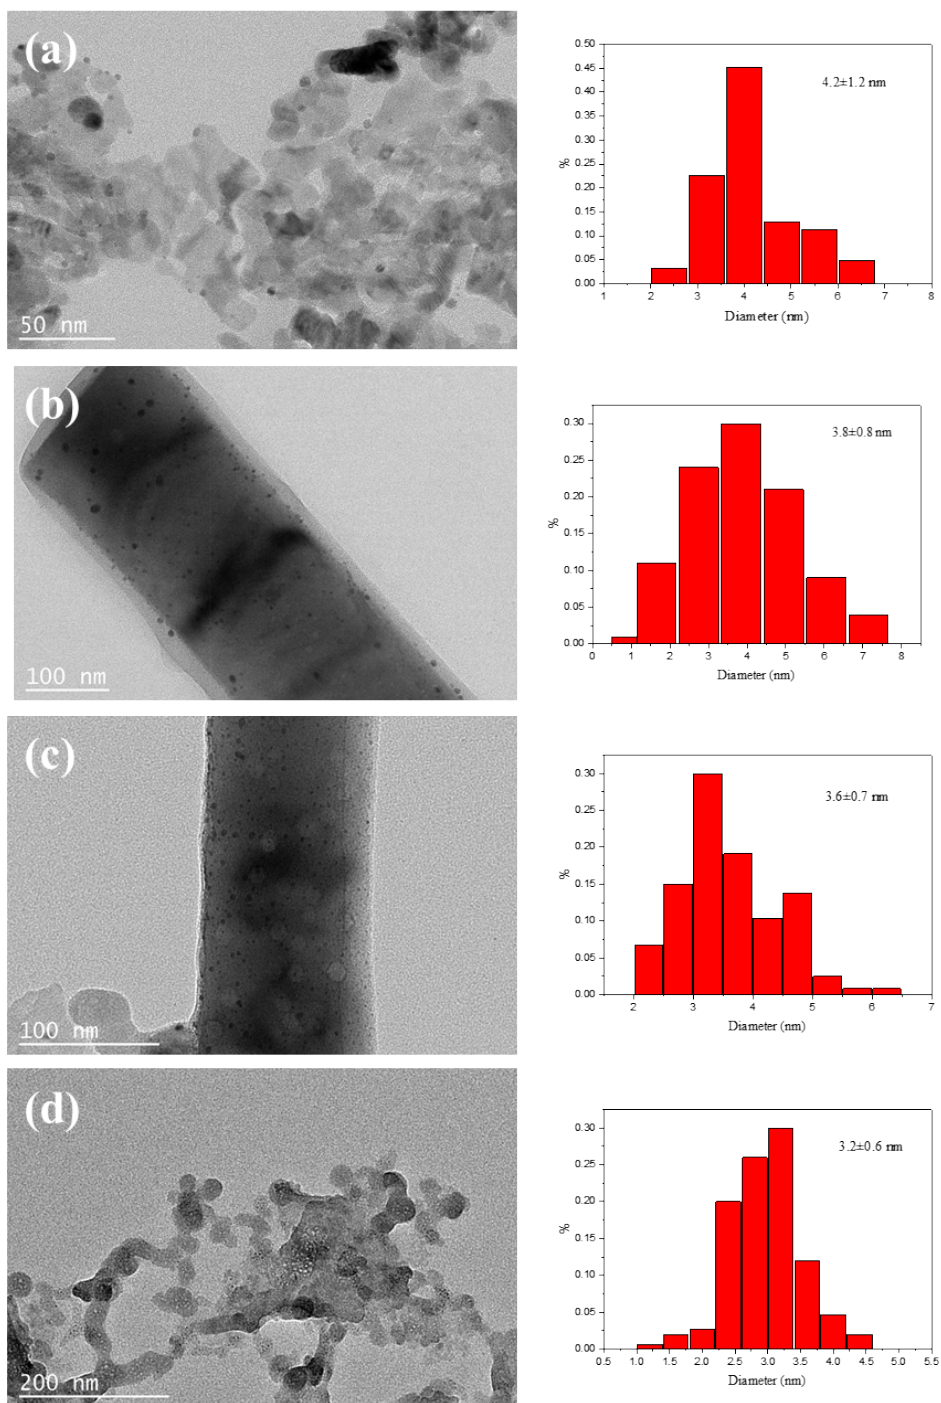

**Fig. S1.** The TEM images of catalysts and relevant Au particles size distribution: (a) Au/ZnO-C6; (b) Au/ZnO-C10; (c) Au/ZnO-C14; (d) Au/ZnO-CTAB.

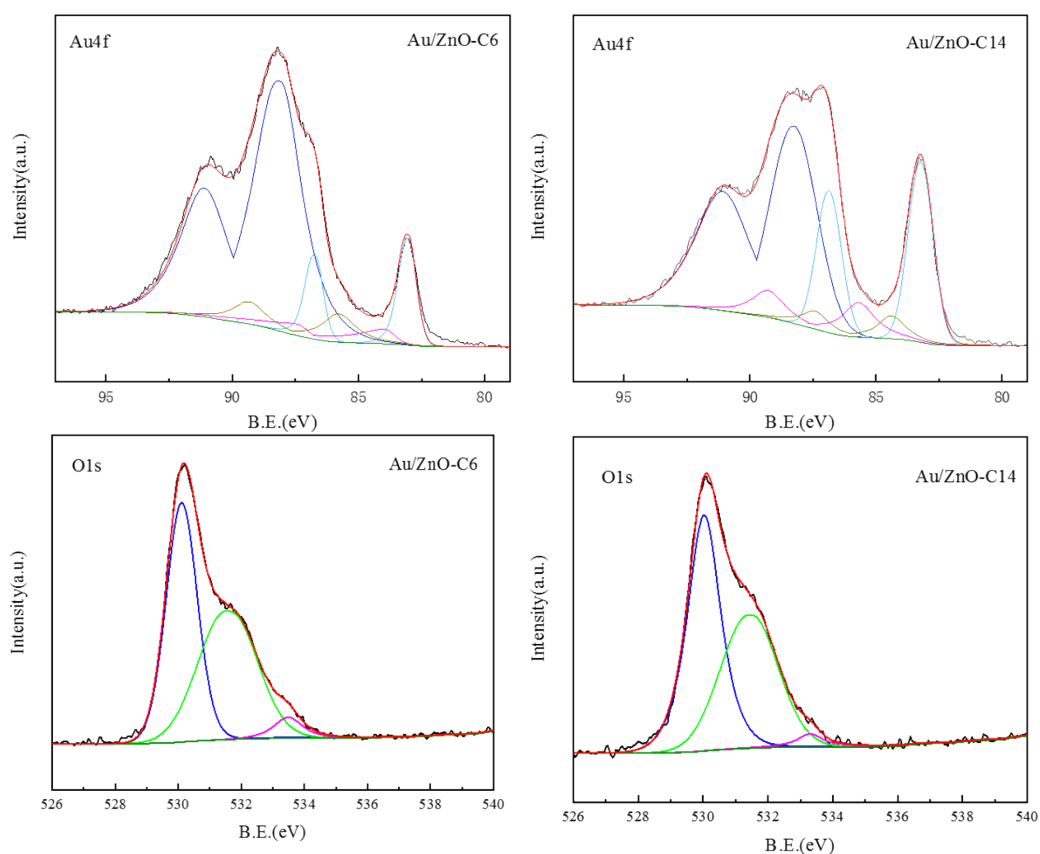

**Fig. S2.** XPS spectra of Au/ZnO-C6 and Au/ZnO-C14

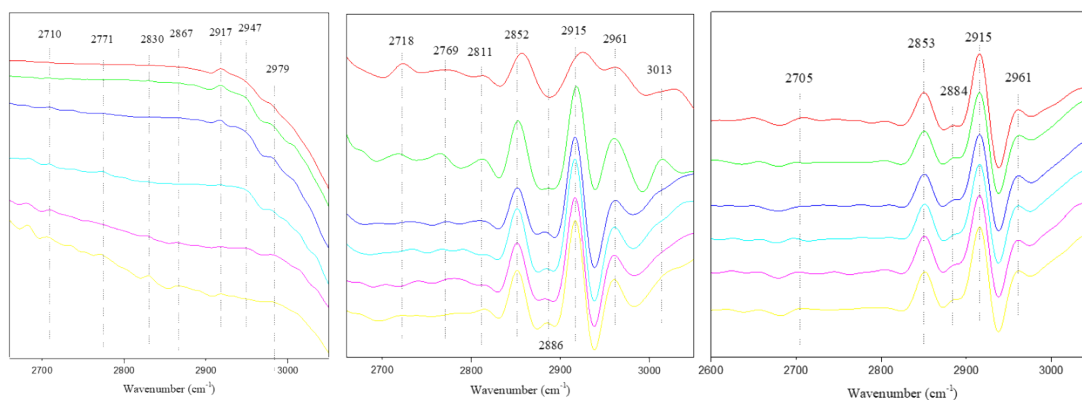

**Fig. S3.** In-situ FT-IR spectra of MAL and MeOH in presence of  $O_2$  at different temperatures over time on Au/ZnO-C10 in the region of 2700-3100  $cm^{-1}$ : (a) 40  $^{\circ}C$ ; (b) 60  $^{\circ}C$ ; (c) 80  $^{\circ}C$ .

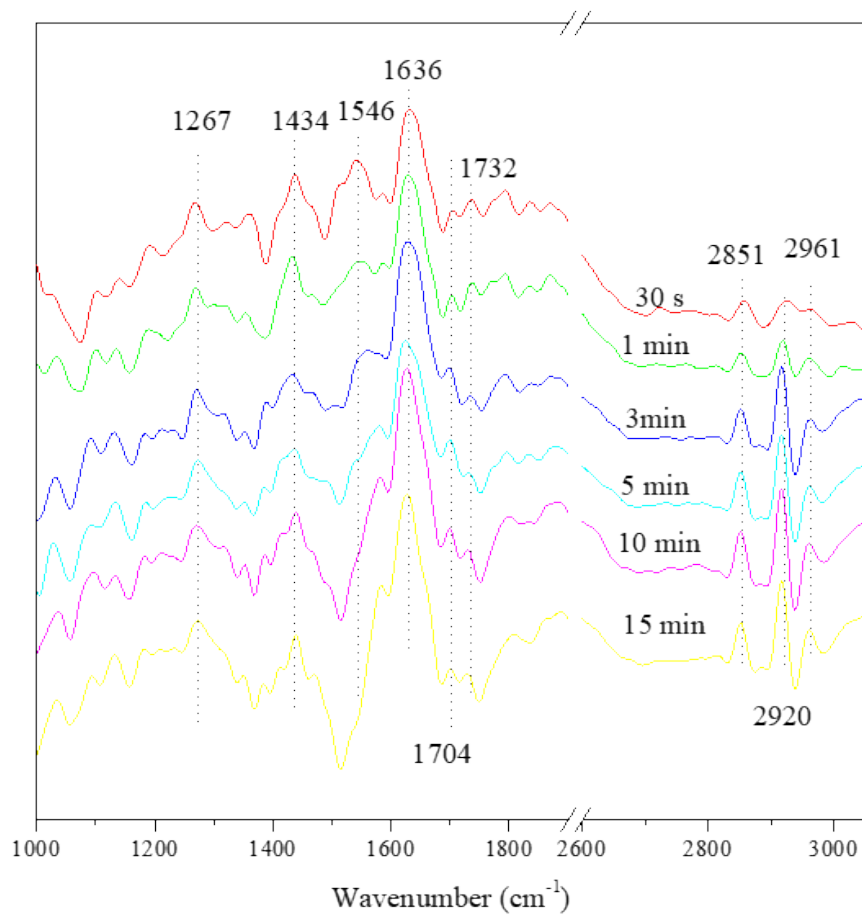

**Fig. S4.** In-situ FT-IR spectra of MAL and MeOH in absence of O<sub>2</sub> at different temperatures at 10 min on Au/ZnO-C10

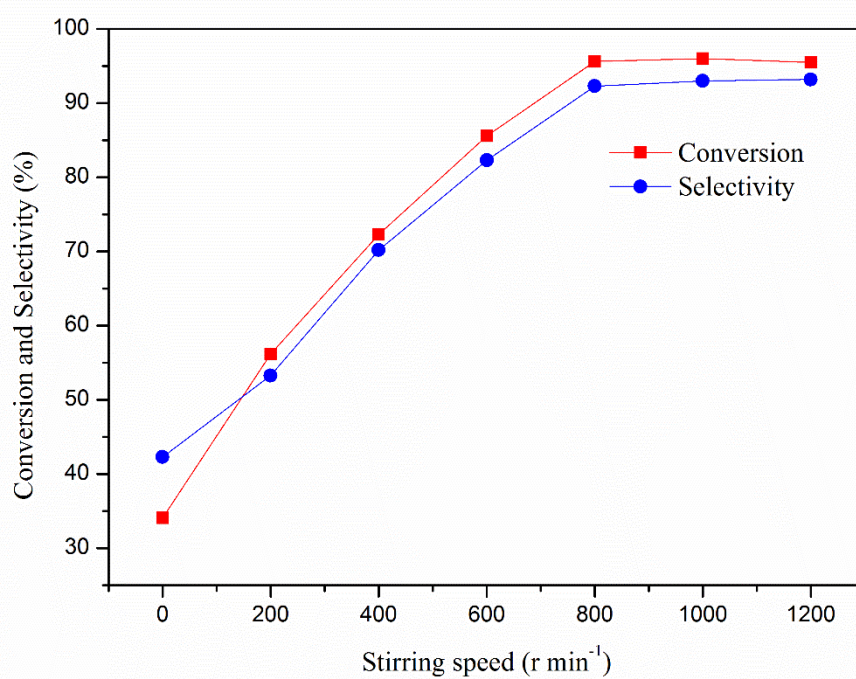

**Fig. S5.** The effect of stirring speed

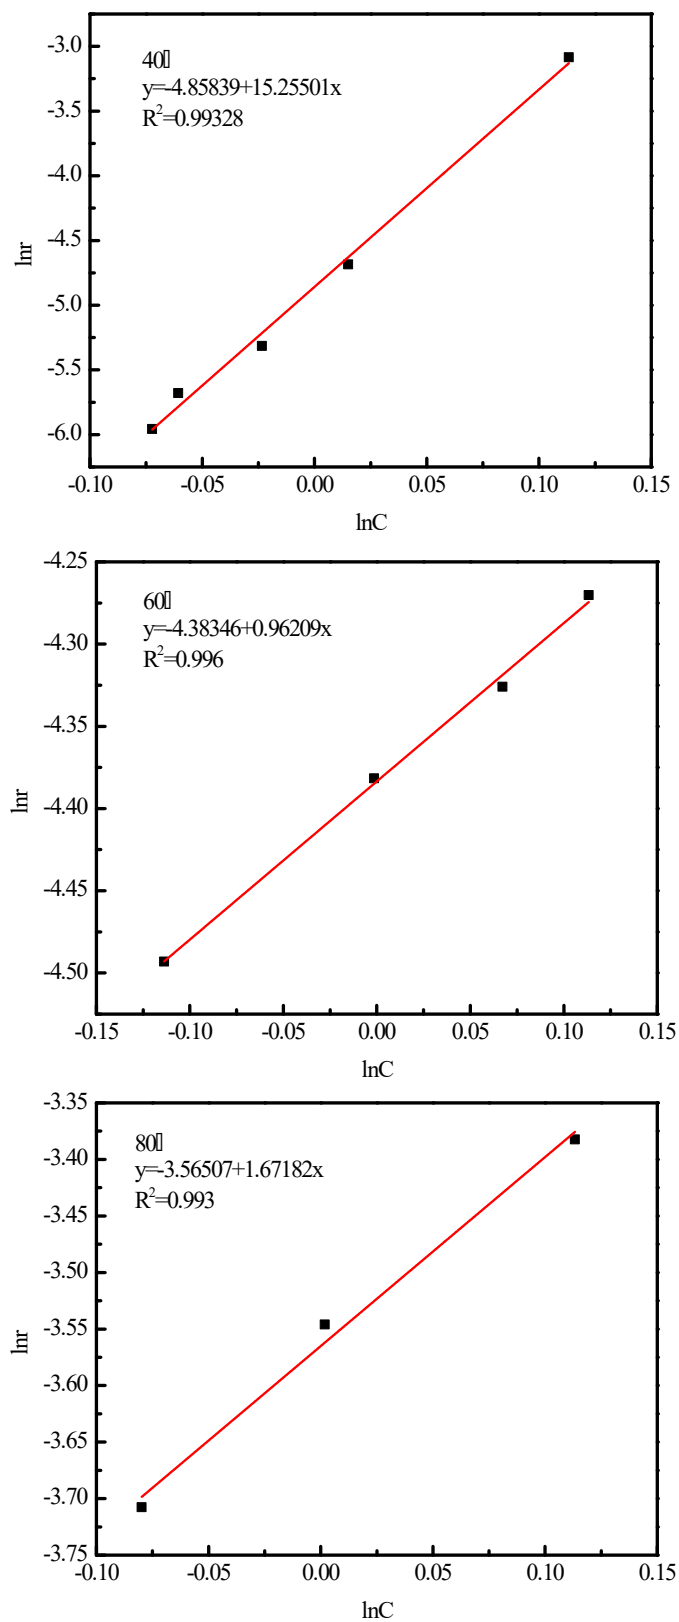

**Fig. S6.** Fitting curves between  $\ln r$  and  $\ln(CMAL)$  at 313 K, 333 K and 353 K when the conversion is  $< 15\%$ .

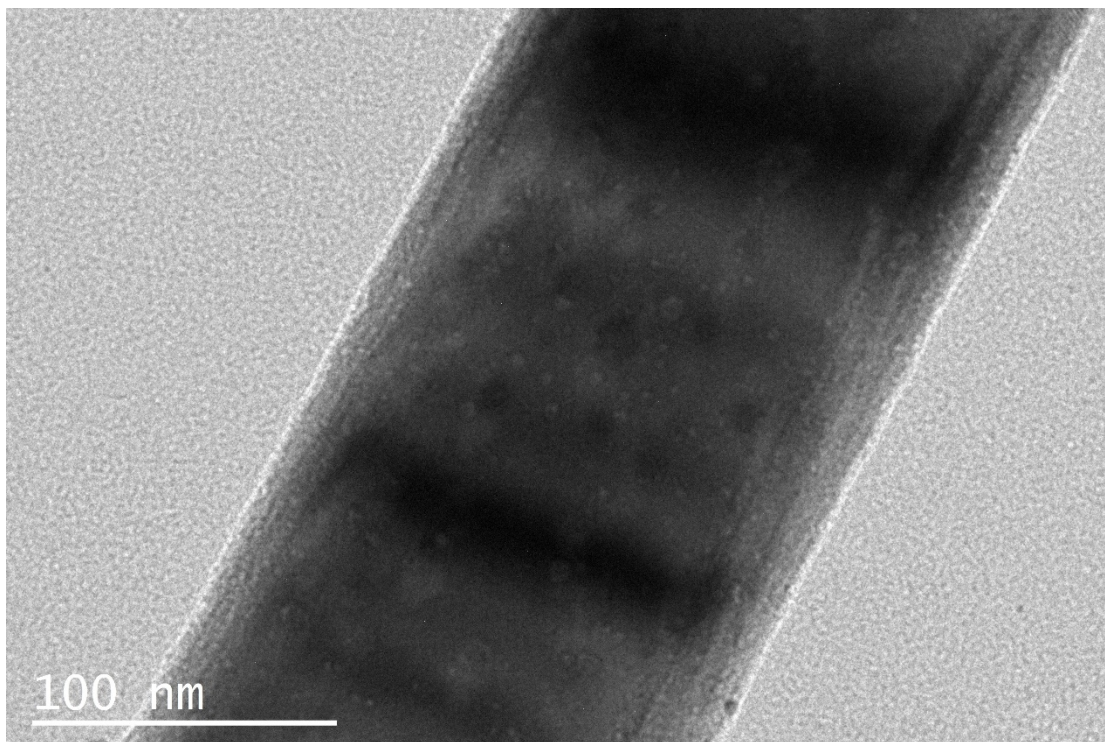

**Fig. S7.** TEM image of Au/ZnO-C10 after reaction

**Table S1** XPS analysis for Au/ZnO catalysts

---

| <b>Catalyst</b>    | <b>O<sub>I</sub></b> |              | <b>O<sub>II</sub></b> |              | <b>O<sub>III</sub></b> |              |
|--------------------|----------------------|--------------|-----------------------|--------------|------------------------|--------------|
|                    | <b>BE(eV)</b>        | <b>%</b>     | <b>BE(eV)</b>         | <b>%</b>     | <b>BE(eV)</b>          | <b>%</b>     |
| <b>Au/ZnO-C6</b>   | <b>530.11</b>        | <b>48.72</b> | <b>531.51</b>         | <b>47.03</b> | <b>533.48</b>          | <b>4.25</b>  |
| <b>Au/ZnO-C10</b>  | <b>529.99</b>        | <b>45.43</b> | <b>530.68</b>         | <b>38.01</b> | <b>531.72</b>          | <b>16.56</b> |
| <b>Au/ZnO-C14</b>  | <b>530.03</b>        | <b>51.64</b> | <b>531.40</b>         | <b>45.09</b> | <b>533.29</b>          | <b>3.27</b>  |
| <b>Au/ZnO-CTAB</b> | <b>529.92</b>        | <b>53.71</b> | <b>531.35</b>         | <b>42.42</b> | <b>533.08</b>          | <b>3.87</b>  |

---
